# Supplementary material
Source: PubMed Central journal article supplement (PMC6402983)
Supplement: NIHMS996977-supplement-Supp_figS1-3.pdf [file NIHMS996977-supplement-Supp_figS1-3.pdf]

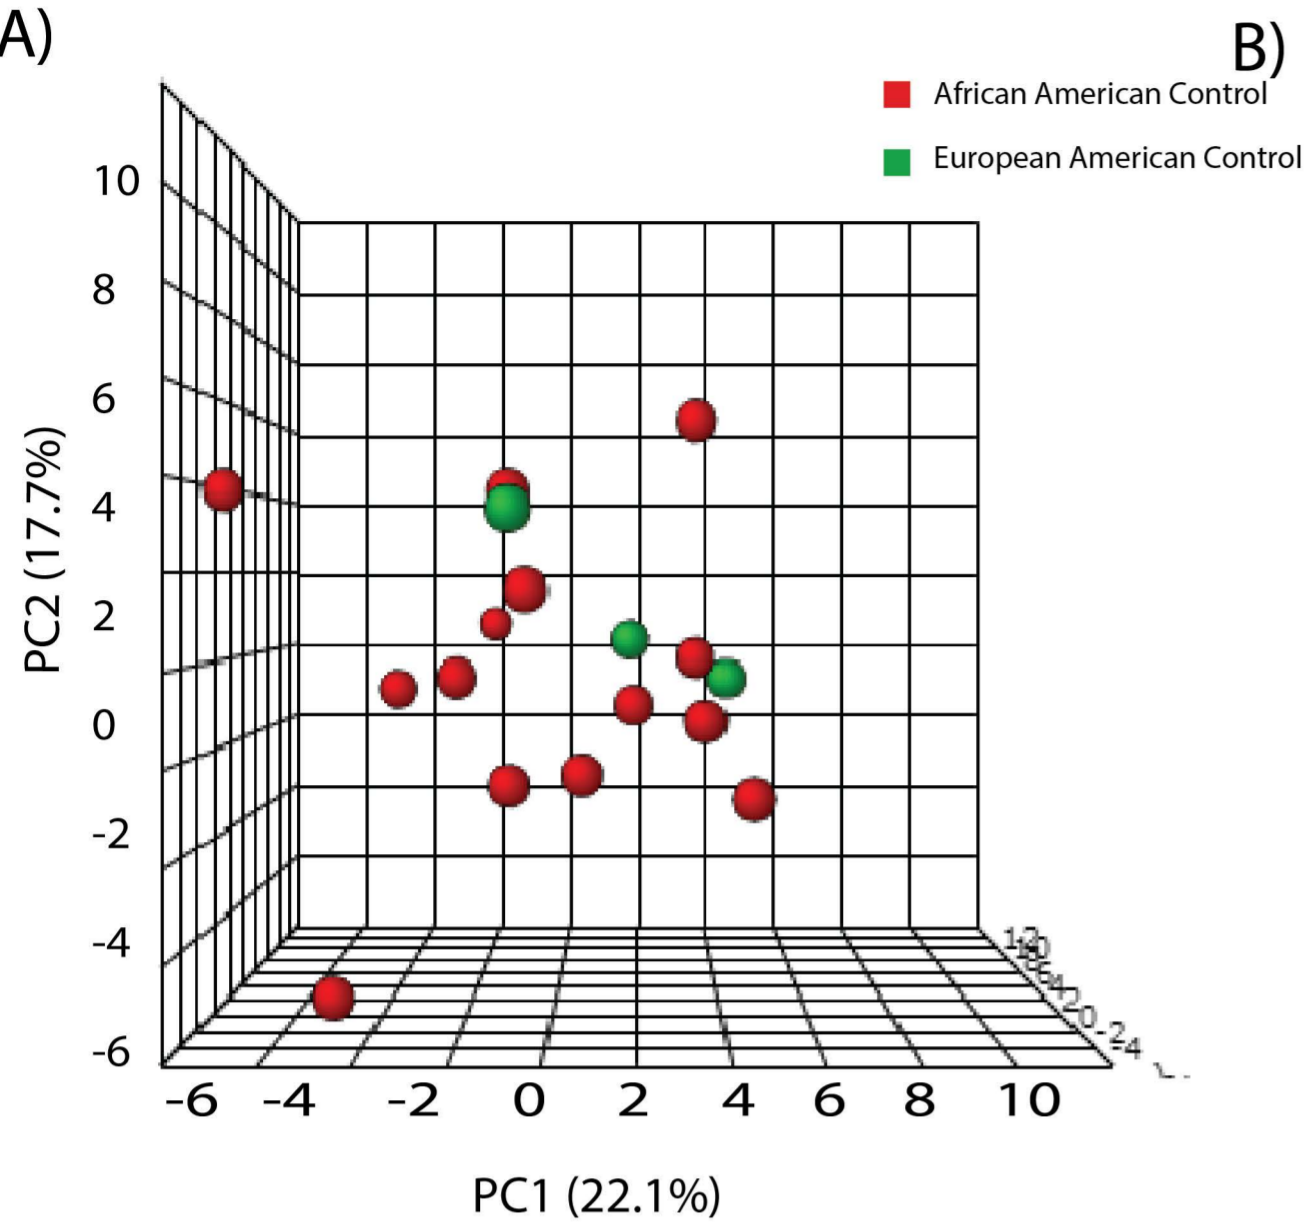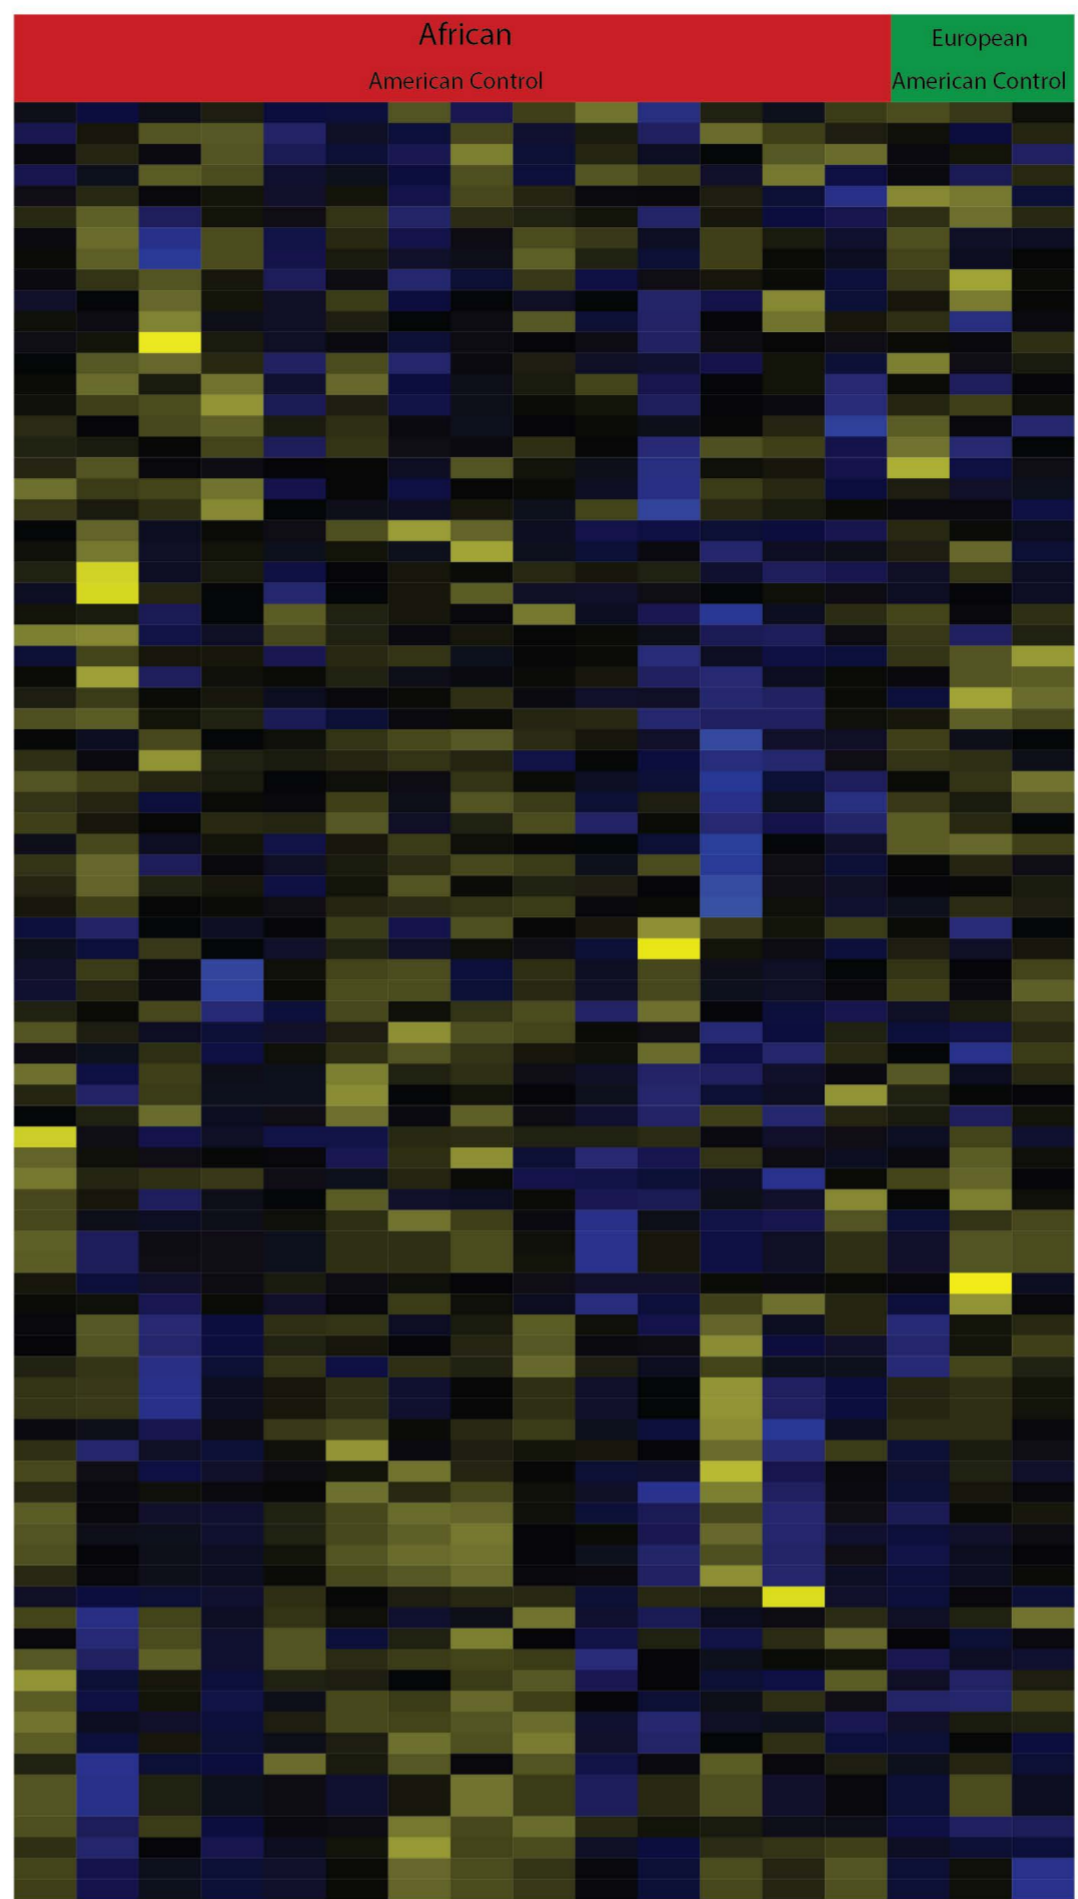

**Supplementary Figure 1**

**Supplementary Figure 2**

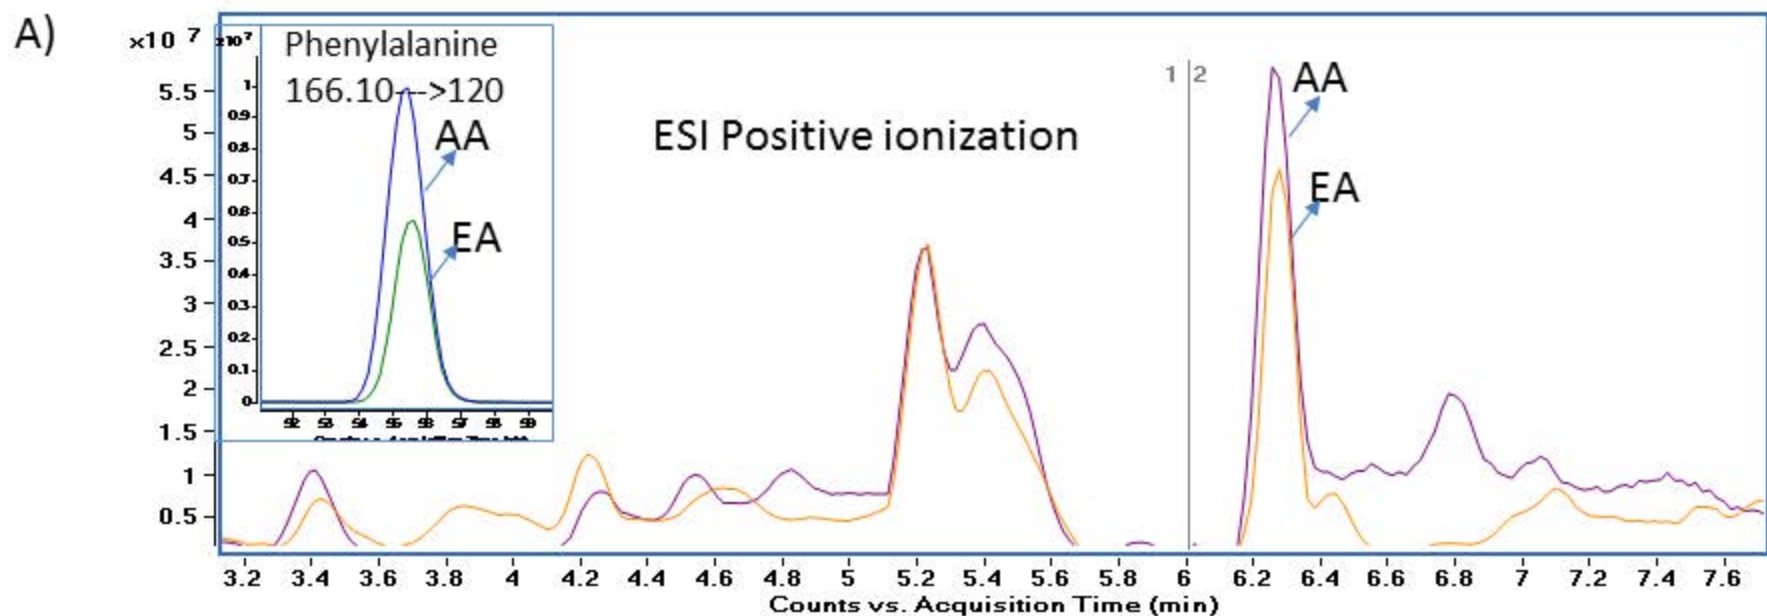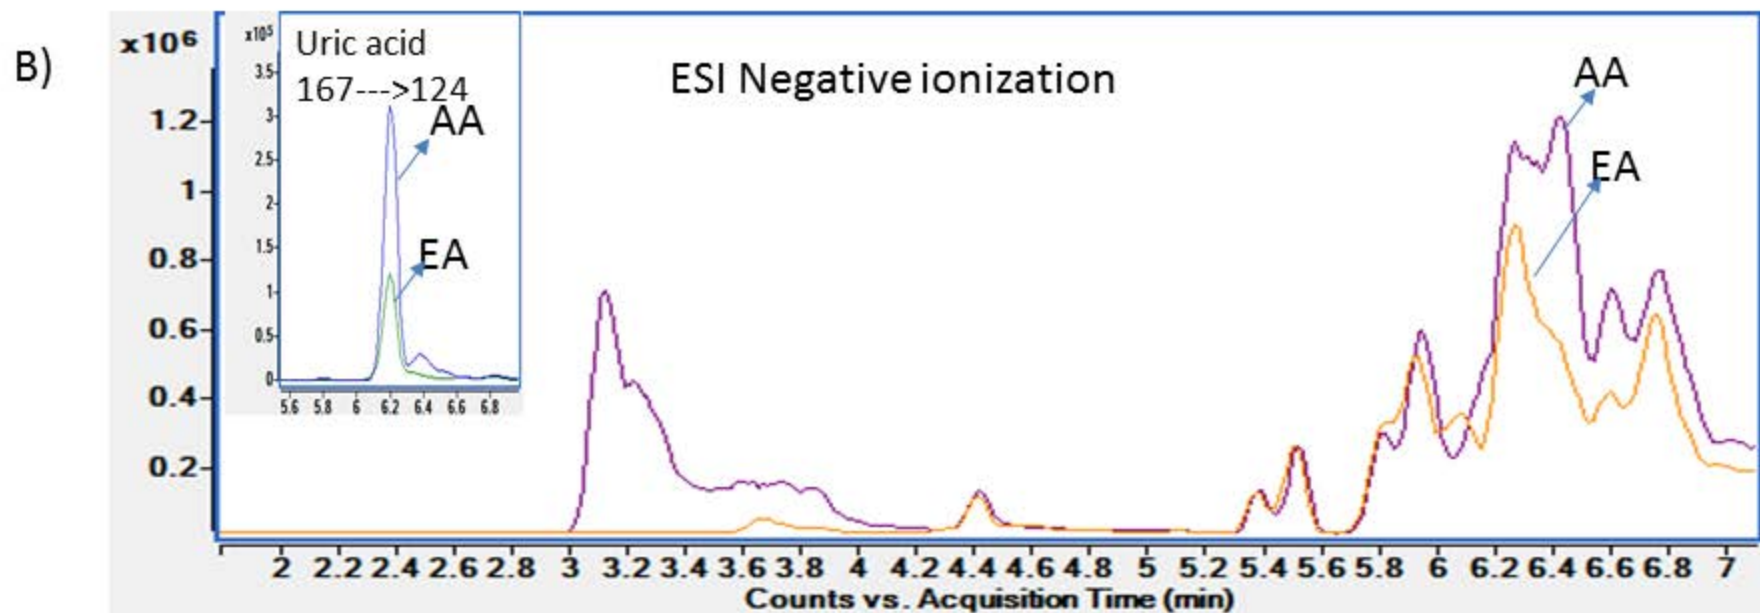

Supplementary Figure 2

### NOS2

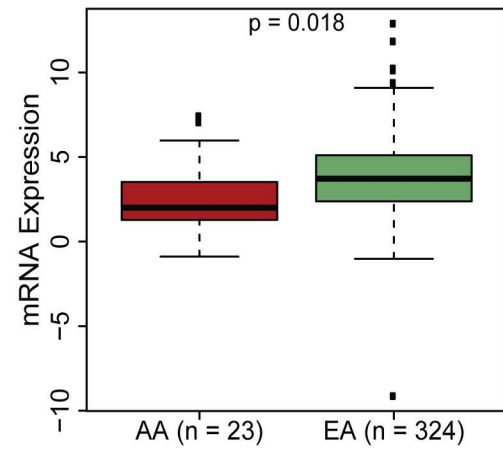

### P4HTM

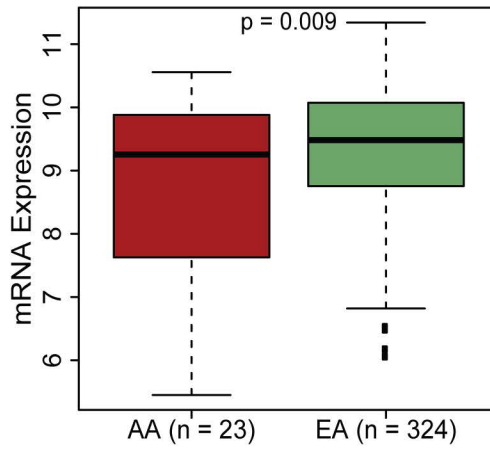

### PDHB

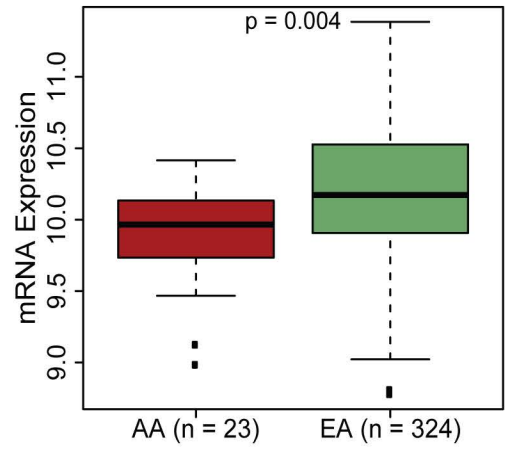

### SLC22A11

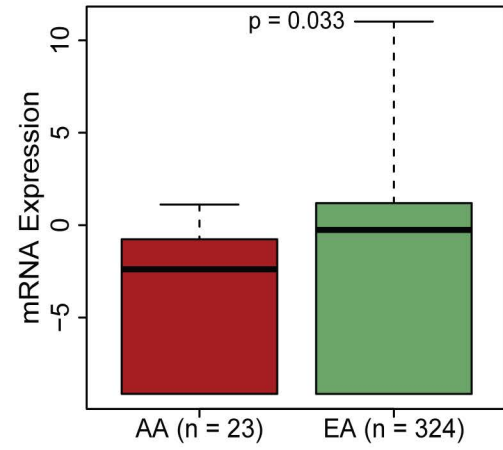

### ADCY6

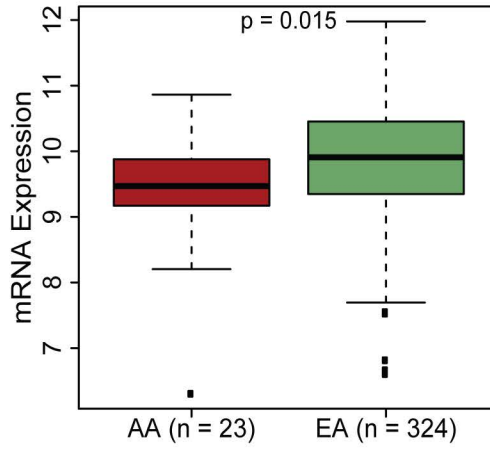

### GDE1

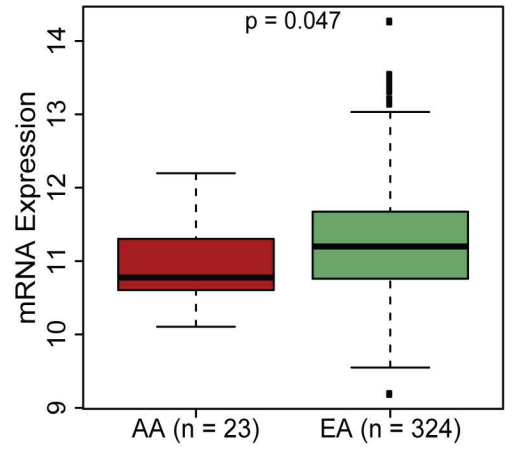

### MPO

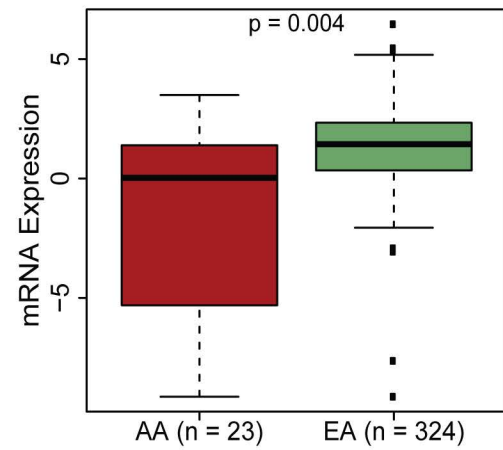

## Supplementary Figure 3
